# Supplementary material
Source: ML conference proceedings conference paper supplement (https://openreview.net/forum?id=ShjMHfmPs0)
Supplement: supplementary_material [file attachment]

For the stylegan2 experiment we use the original code that is released in here <https://github.com/NVLabs/stylegan3>

To train the model, run:

```
python3 train.py --outdir=training-runs --cfg=stylegan2 --data=<data to train on from previous model> --gpus=8 --batch=32 --gamma=10 --mirror=1 --aug=noaug
```

To generate images:

```
python3 gen_images.py --outdir=generated_images/iter<iter#> --trunc=1 --seeds=1-70000 --network=<previously trained net>
python3 dataset_tool.py --resolution=128x128 --source=<location to save next generated dataset>
```

For unbiased sampling we use trunc=1 and for biased sampling we use trunc=0.7.

For the synthetic loop, the first model is trained on original ffhq dataset, and the next models are trained on synthetic data generated by the previous model.
