# Supplementary material
Source: ML conference proceedings conference paper supplement (https://openreview.net/forum?id=ShjMHfmPs0)
Supplement: supplementary_material [file attachment]

For the stylegan2 experiment we use the original code that is released in here <https://github.com/NVLabs/stylegan3>

To train the model, run:

```
python3 train.py --outdir=training-runs --cfg=stylegan2 --data=<data to train on from previous model> --gpus=8 --batch=32 --gamma=10 --mirror=1 --aug=noaug
```

To generate images:

```
python3 gen_images.py --outdir=generated_images/iter<iter#> --trunc=1 --seeds=1-70000 --network=<previously trained net>
python3 dataset_tool.py --resolution=128x128 --source=<location to save next generated dataset>
```

For this experiment we only use unbiased sampling, `trunc = 1`

For the augmented synthetic loop, the first model is trained on original ffhq dataset, and the next models are trained on ""all"" synthetic data generated by the previous models, combined with the original ffhq dataset.
